# Supplementary material for: Continuous-Flow Separation and Efficient Concentration of Foodborne Bacteria from Large Volume Using Nickel Nanowire Bridge in Microfluidic Chip
Source: MDPI journal article supplement (doi:10.3390/mi10100644), 2019-09-25
Supplement: s1 [file s1]

# Supplementary Materials: Continuous-flow separation and efficient concentration of foodborne bacteria from large volume using nickel nanowire bridge in microfluidic chip

Xiaoting Huo, Qi Chen, Lei Wang, Gaozhe Cai, Wuzhen Qi, Zengzilu Xia, Weijia Wen and

Jianhan Lin

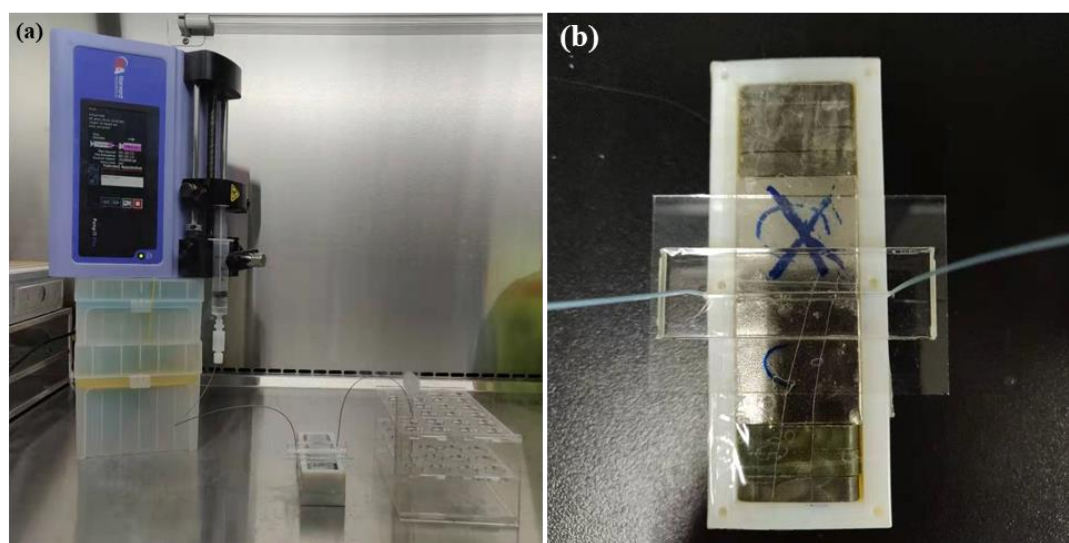

**Figure S1.** The photographs of continuous-flow separation system (a) and the microfluidic chip (b).

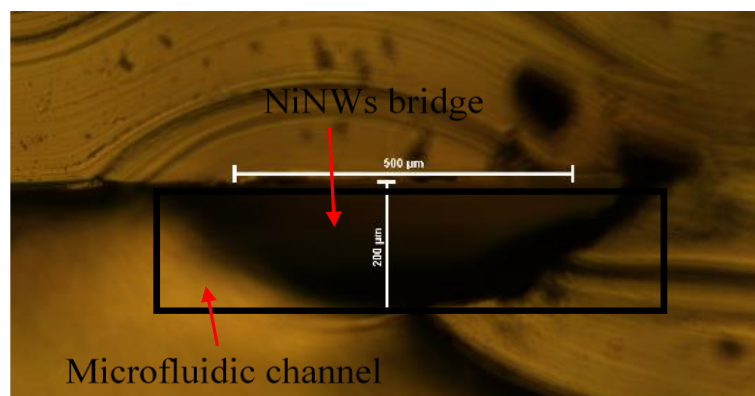

**Figure S2.** The image of the NiNWs bridge.
